# Supplementary material for: NETs Promote Inflammatory Injury by Activating cGAS-STING Pathway in Acute Lung Injury
Source: MDPI journal article supplement (doi:10.3390/ijms24065125), 2023-03-07
Supplement: s1 [file s1]

## Supplemental Figure S1: Successful establishment of acute lung injury model.

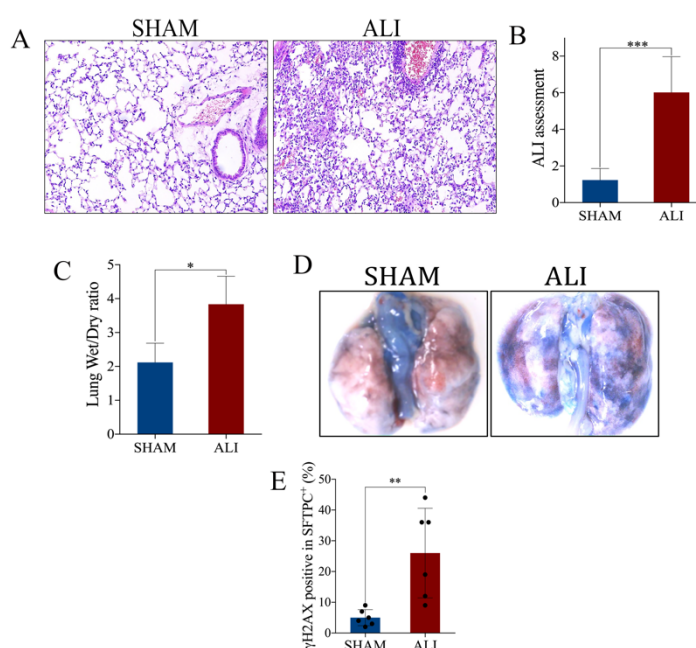

**Legends:** Healthy C57BL/6 mice were intratracheally administered LPS (10 mg/kg) or SHAM (PBS). (A) Representative image of H&E stain of lung tissue 24 h after LPS or PBS administration (X100). (B) ALI assessment score. (C) Lung wet weight to dry ratio. (D) Representative images of Evans blue. (E) The percentage of  $\gamma$ H2AX positive cells in SFTPC<sup>+</sup> in lung tissue with immunofluorescence co-localization. Data were presented as Mean  $\pm$  SD, \* $p$ <0.05, \*\* $p$ <0.01, \*\*\* $p$ <0.001. Comparison between two groups were analyzed by an unpaired t test.

## Supplemental Table S1. Sequences of the primers used to quantitate gene expression.

| Gene  | Species | Primer  | Sequence (5'-3')       |
|-------|---------|---------|------------------------|
| GAPDH | Human   | Forward | CCACGATAACACCAGCTTCG   |
| GAPDH | Human   | Reverse | ACTTGAGCATGTAGGCCTGT   |
| cGAS  | Human   | Forward | GAAGAAACATGGCGGCTATC   |
| cGAS  | Human   | Reverse | TGAGGGTTCTGGGTACATACG  |
| STING | Human   | Forward | CAGGCACTGAACATCCTCCT   |
| STING | Human   | Reverse | ATATACAGCCGCTGGCTCAC   |
| GAPDH | Mouse   | Forward | TCGAGTCGCGTCCACC       |
| GAPDH | Mouse   | Reverse | GGGAGCATCGTCGCCC       |
| cGAS  | Mouse   | Forward | CCGAAGAGCGGCAGATATGGAA |
| cGAS  | Mouse   | Reverse | CGTGGCTTCTCCGTGGTGTCC  |
| STING | Mouse   | Forward | AAATAACTGCCGCCTCATTG   |
| STING | Mouse   | Reverse | TGGGAGAGGCTGATCCATAC   |
